# Supplementary material for: The Inhibition of B7H3 by 2-HG Accumulation Is Associated With Downregulation of VEGFA in IDH Mutated Gliomas
Source: Frontiers journal article supplement (doi:10.3389/fcell.2021.670145), 2021-05-17

Figure 1B

B

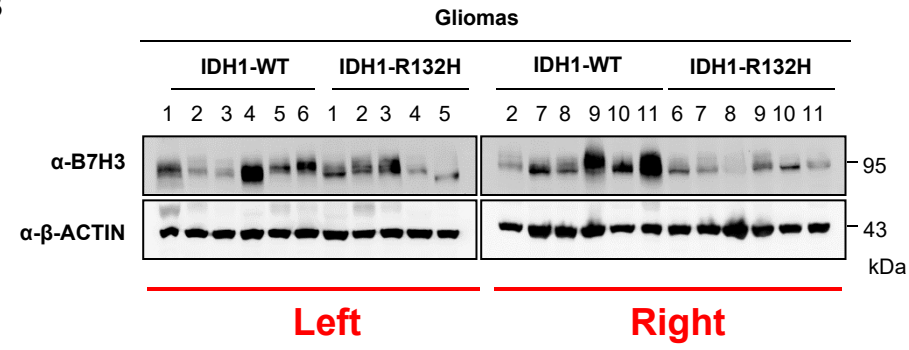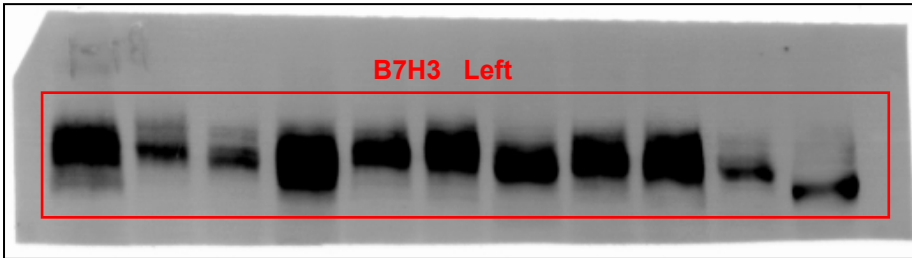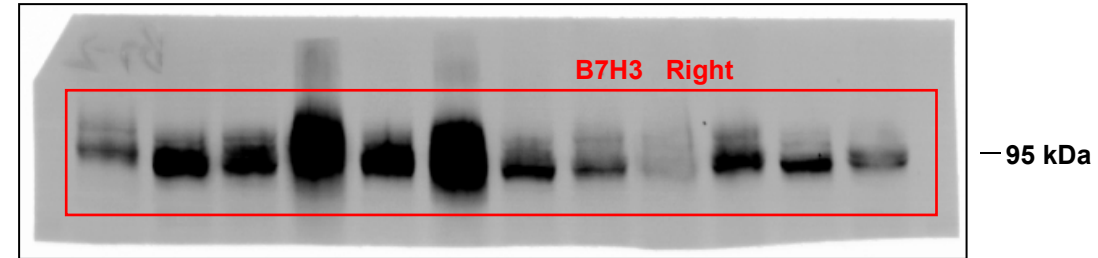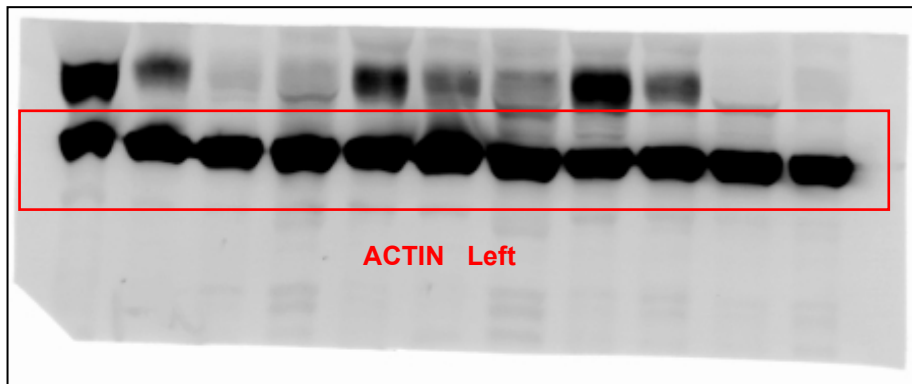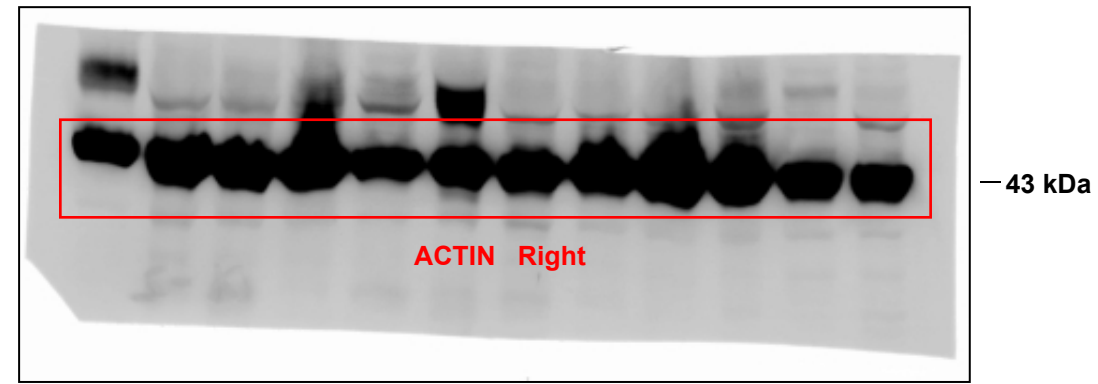

Figure 2A-B

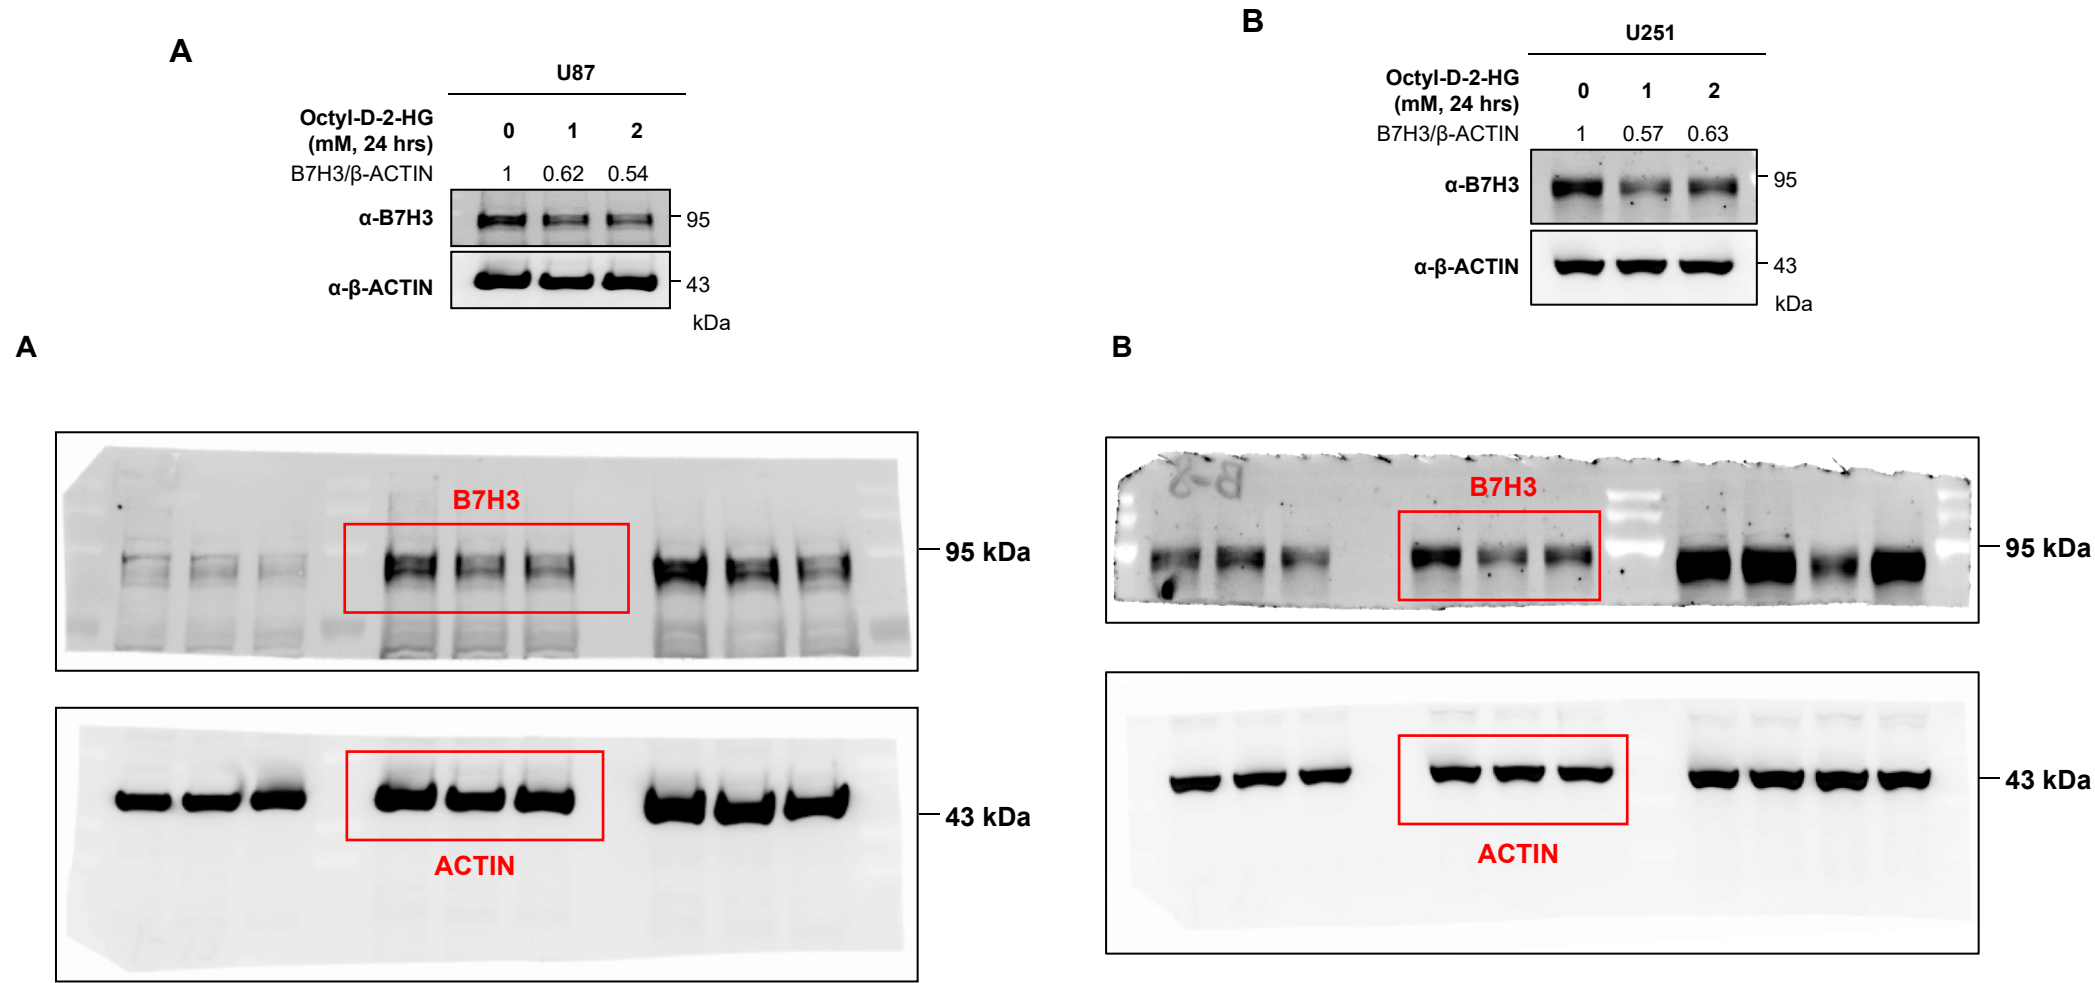

Figure 2C-D

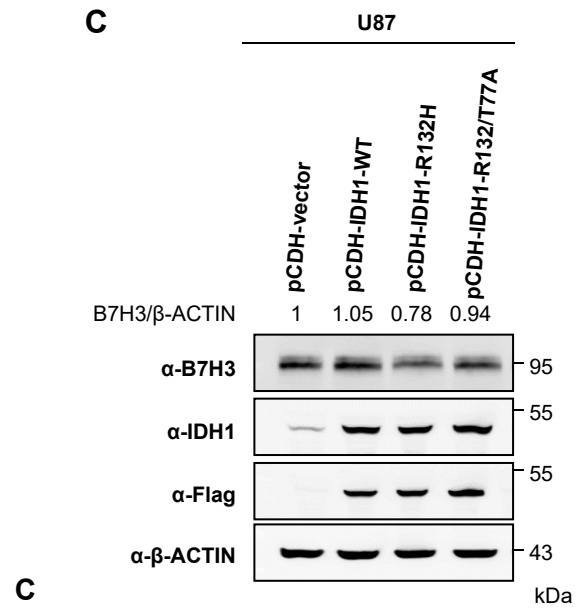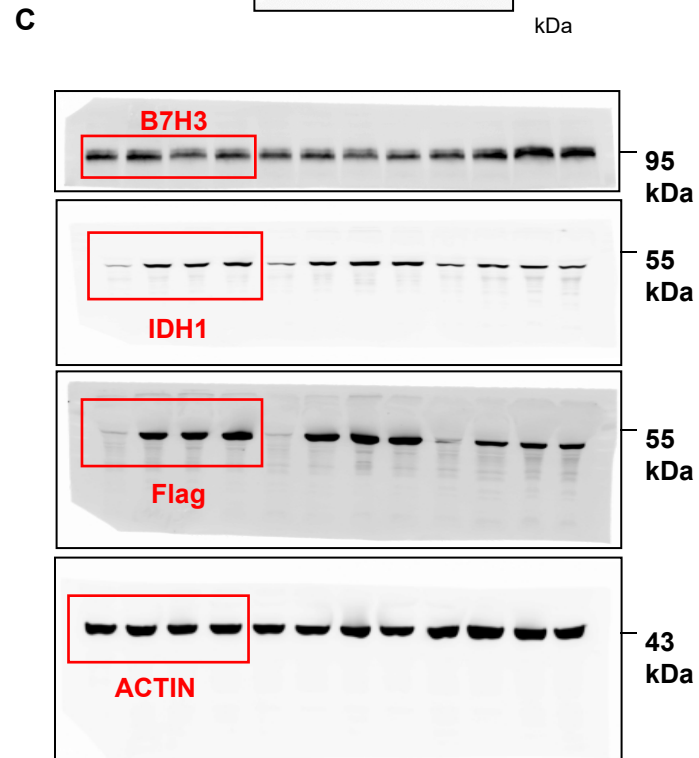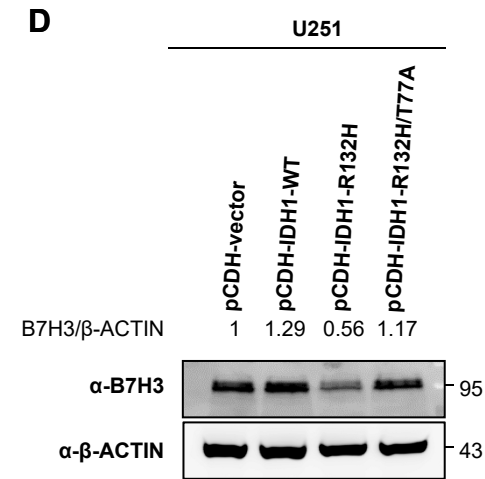

**D**

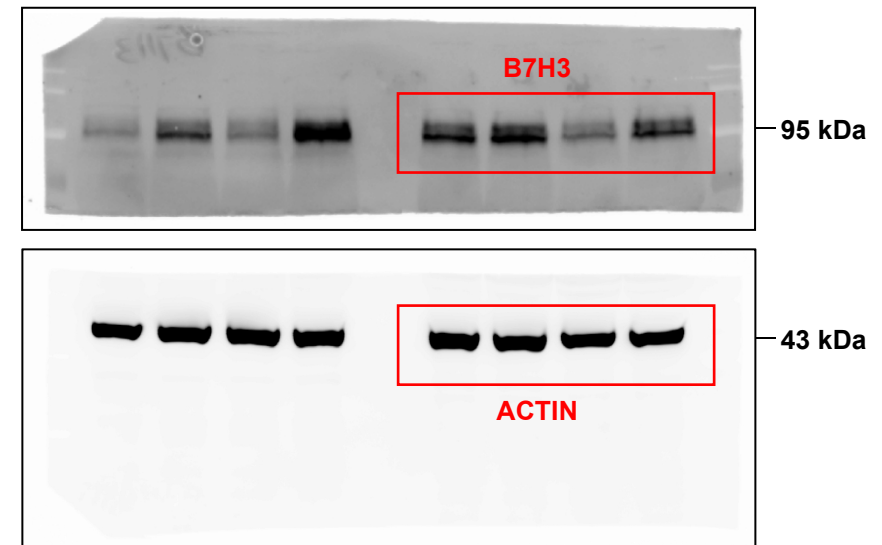

Figure 3A-B

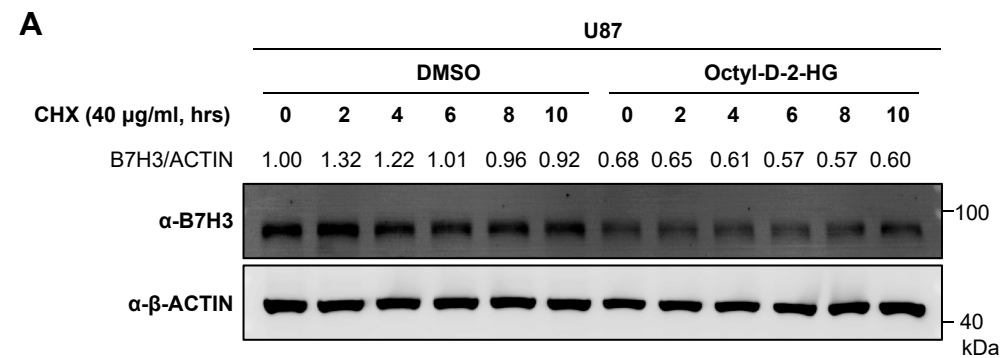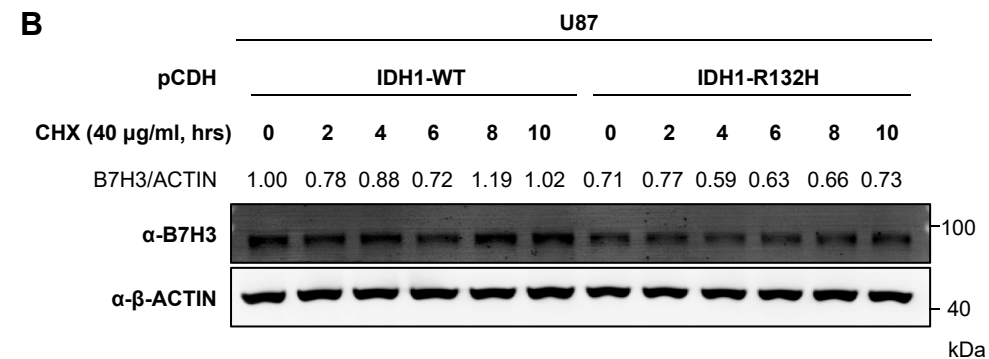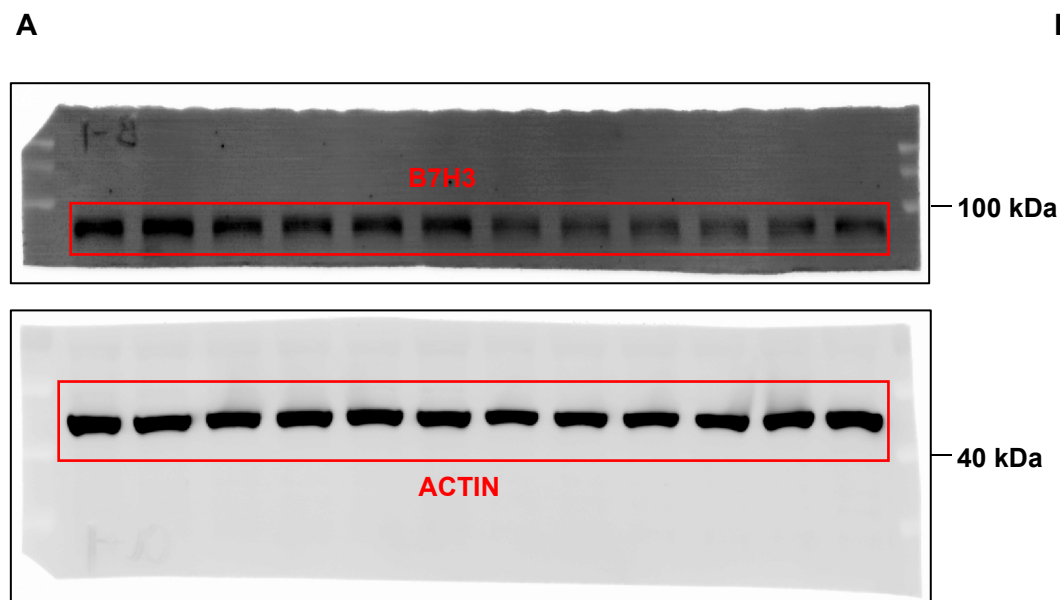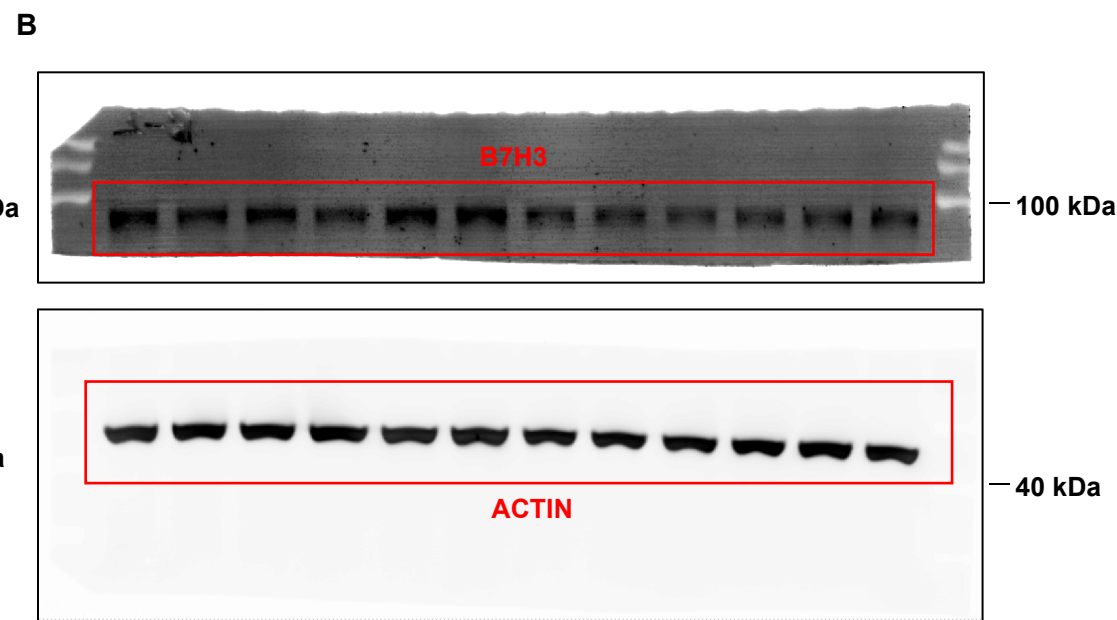

Figure 3C-D

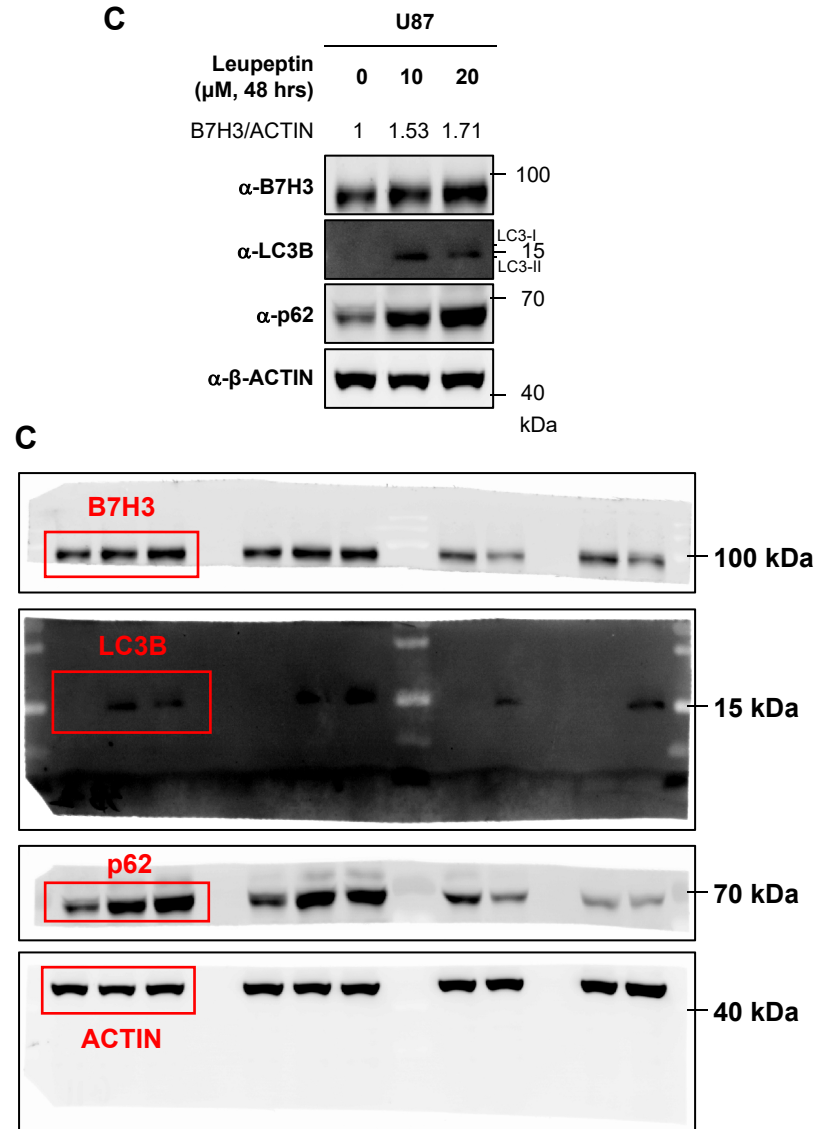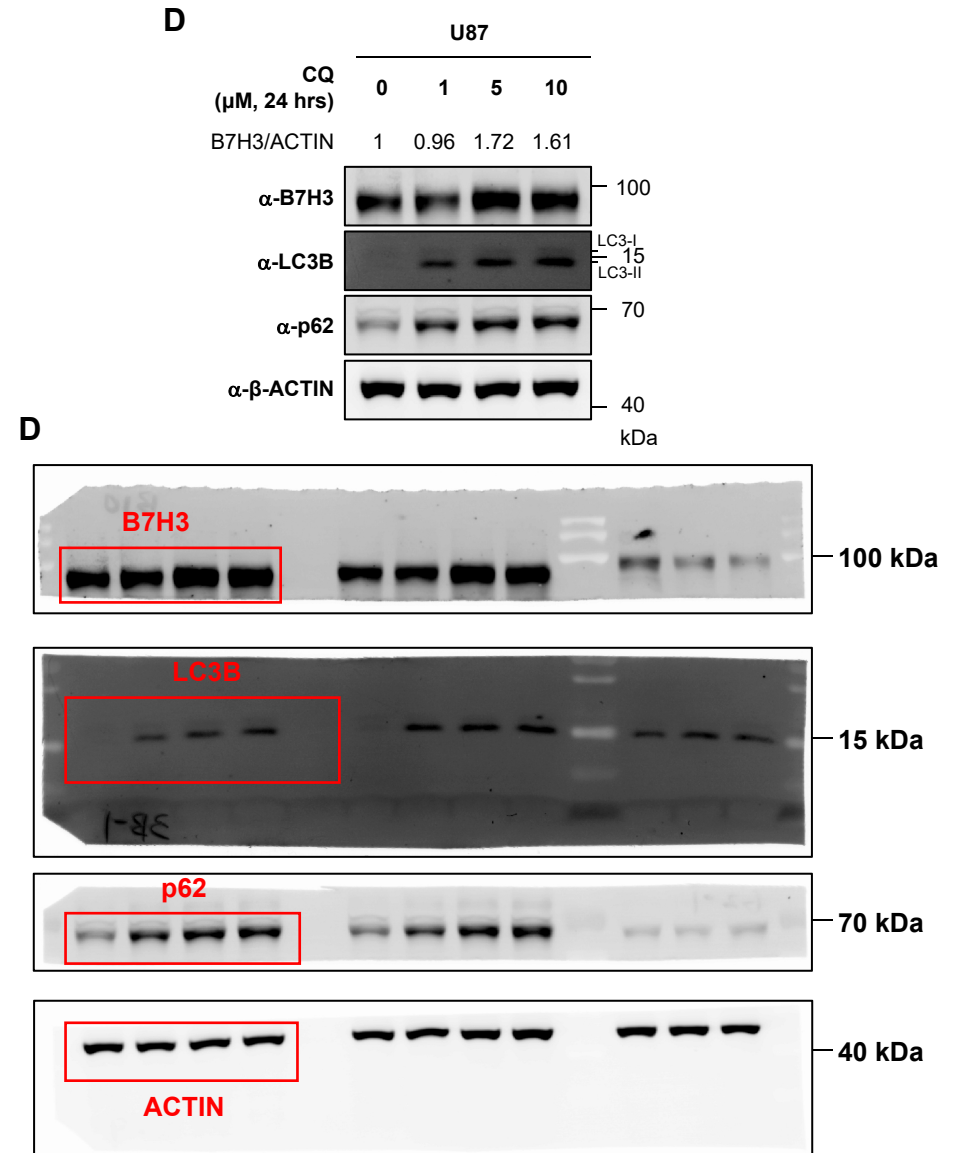

Figure 3E-F

E

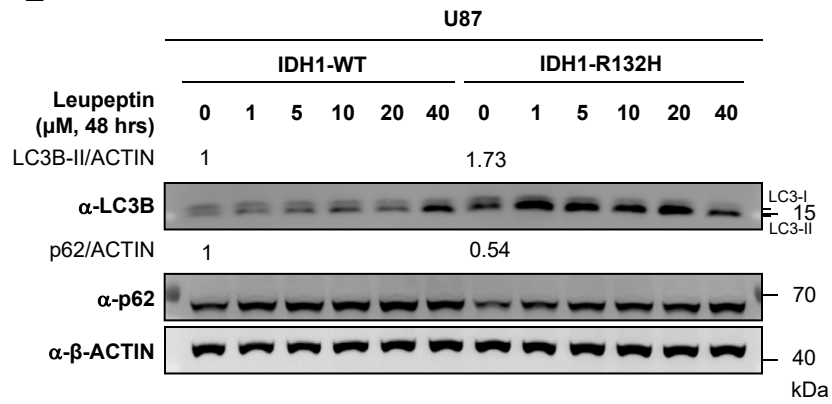

E

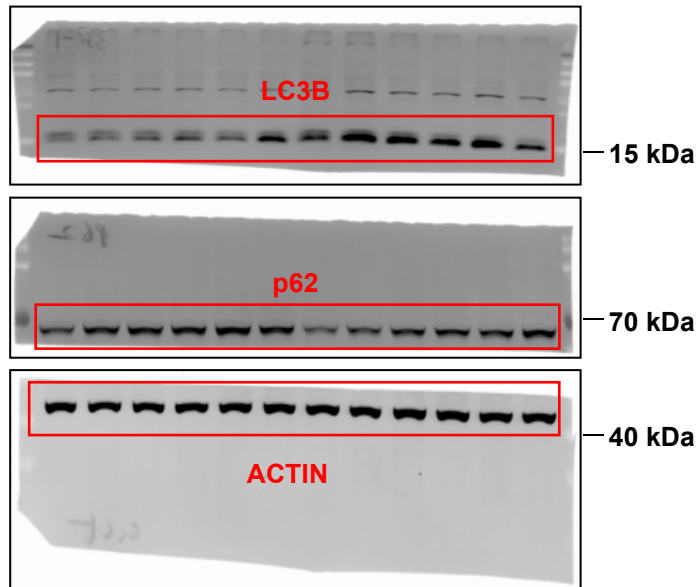

F

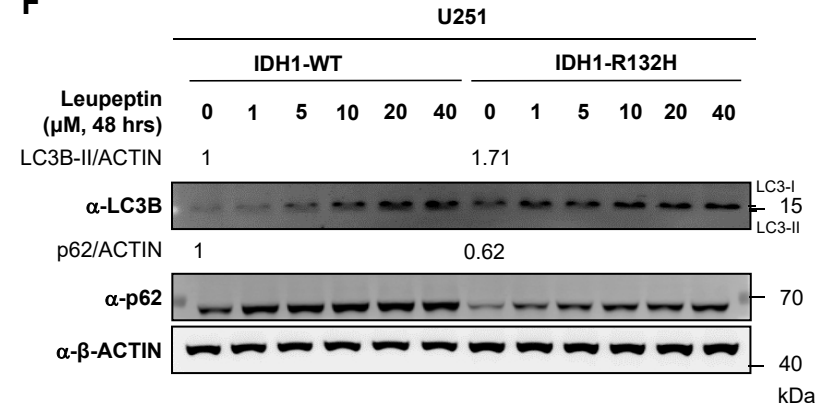

F

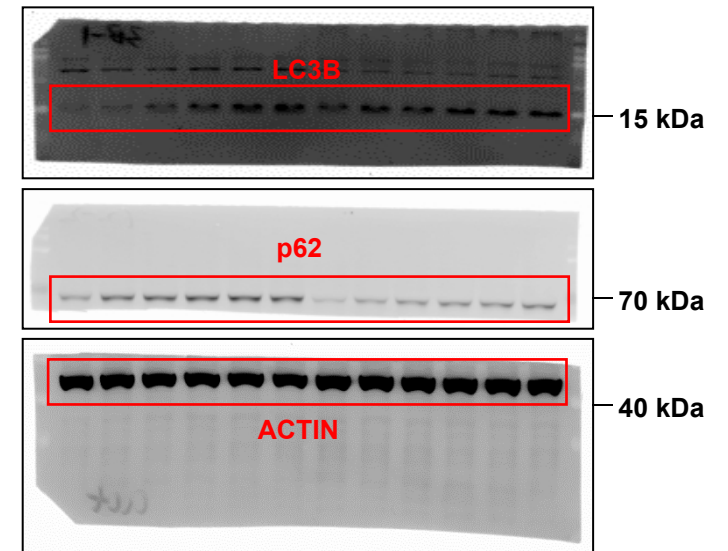

Figure 3H

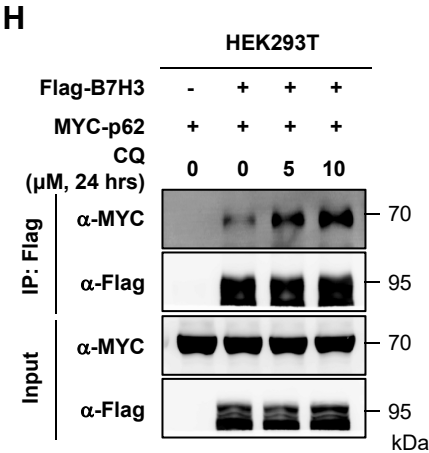

**H**

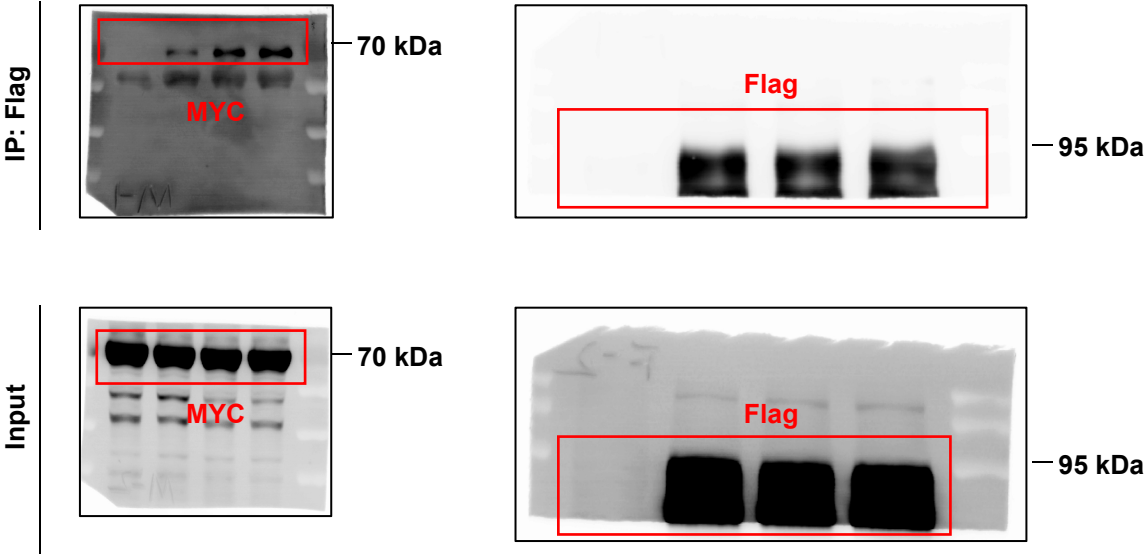

Figure 5A

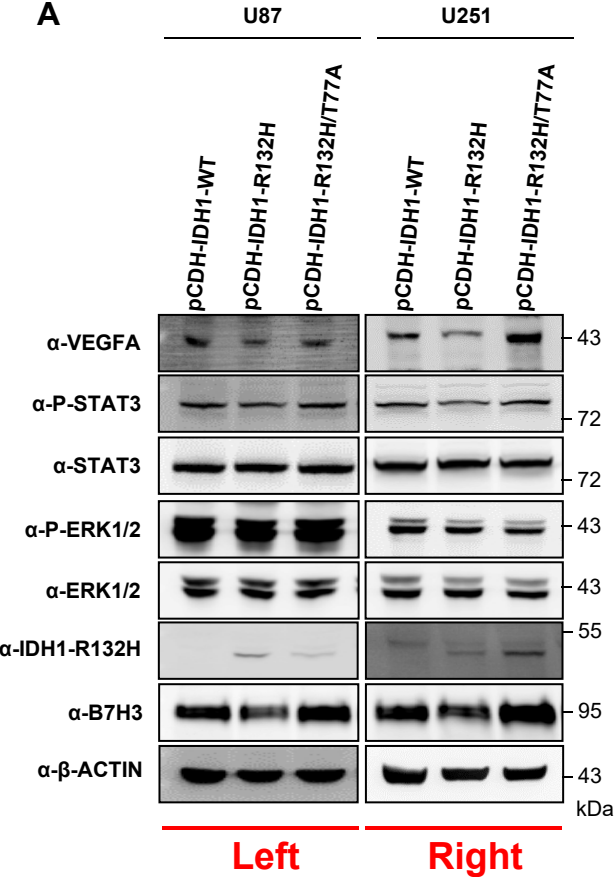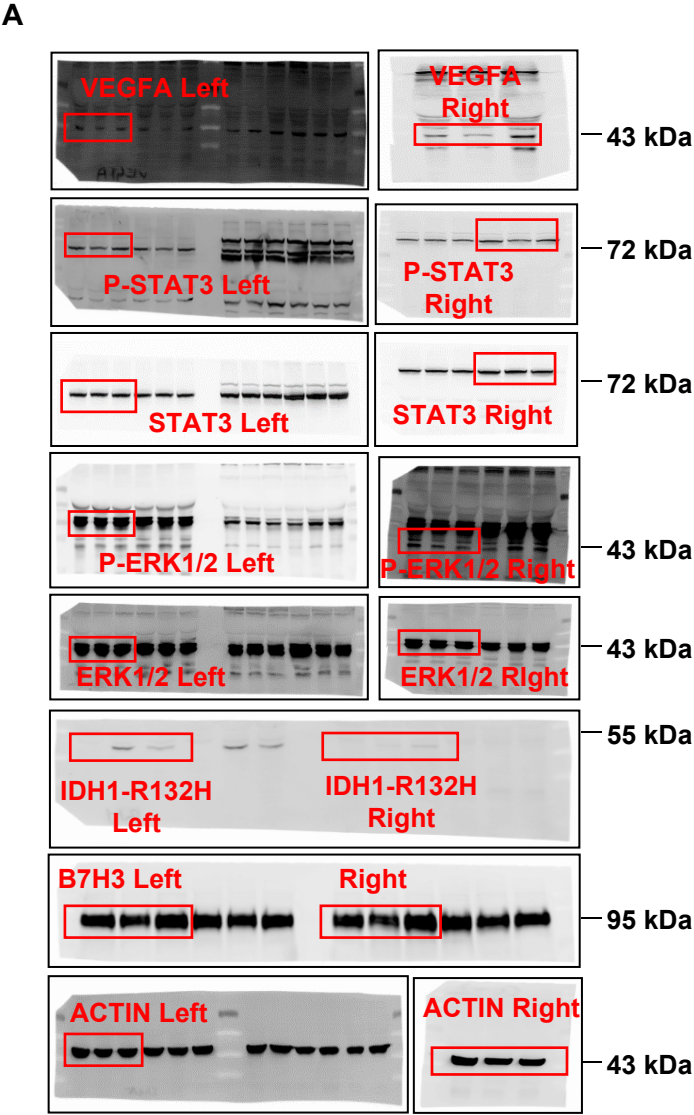

Figure 5B

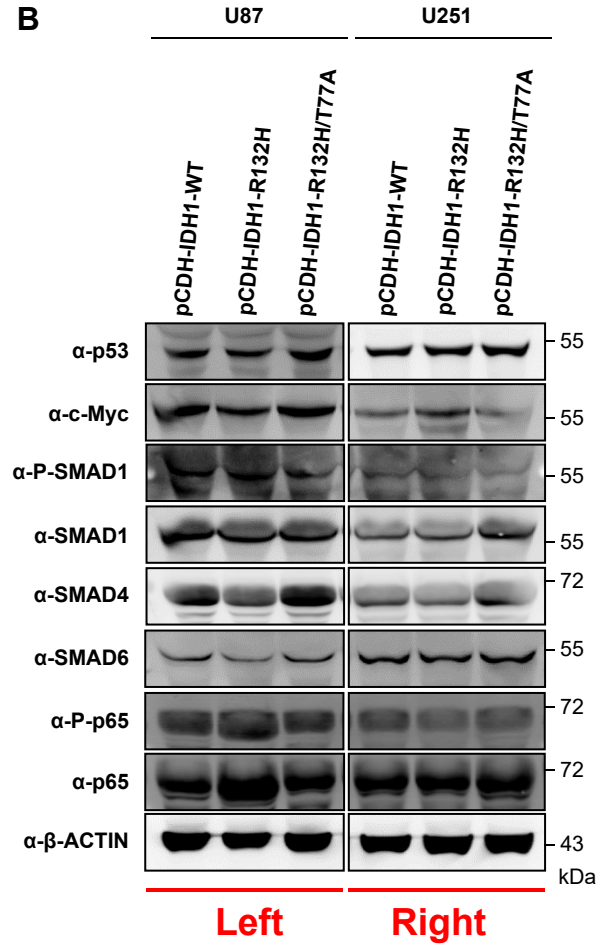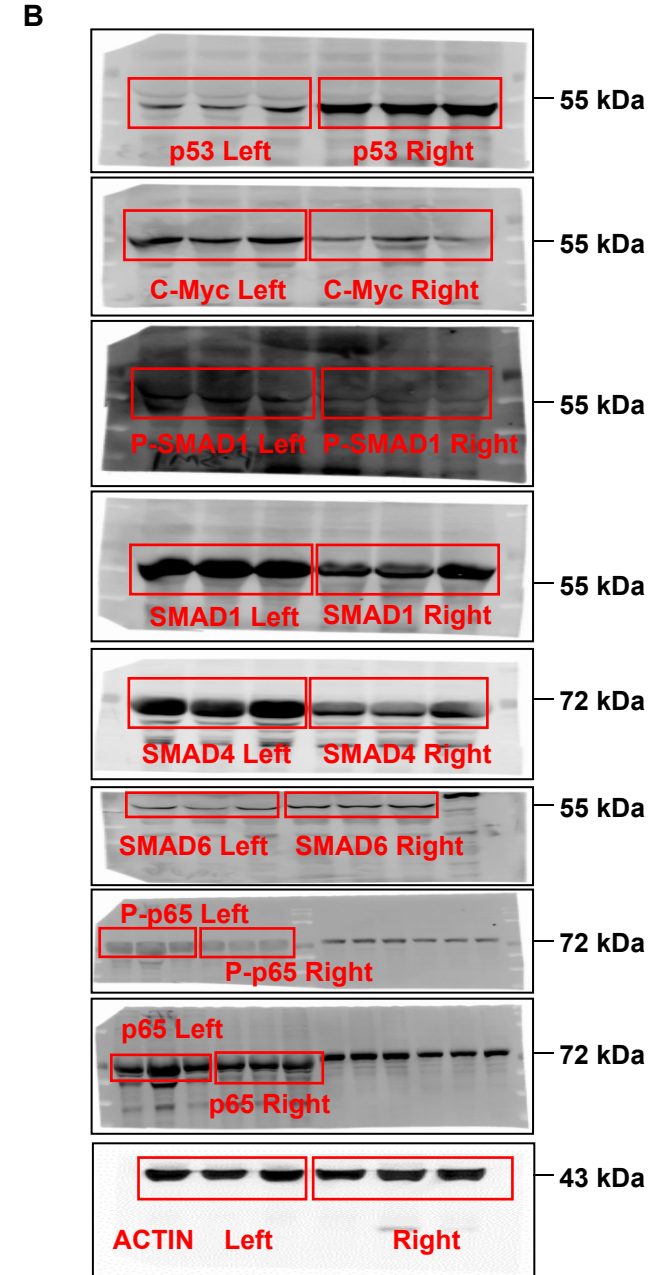

**A**

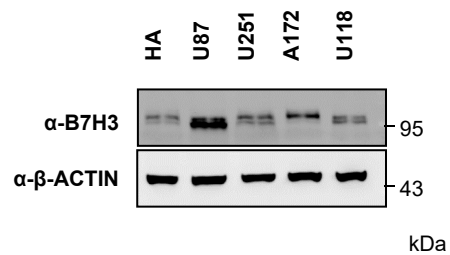

**Supplementary Figure 1A**

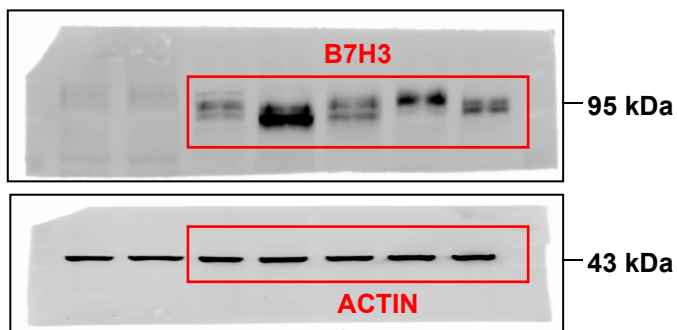

**C**

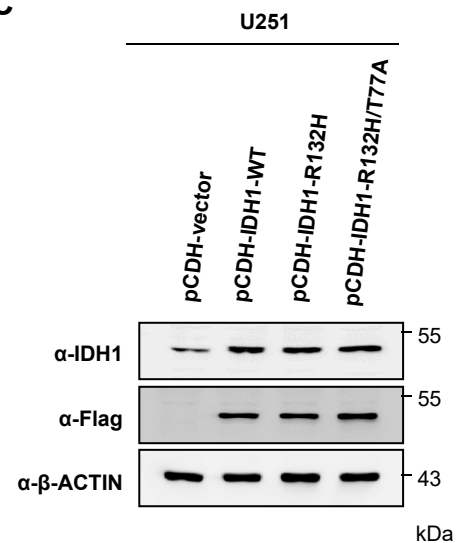

**Supplementary Figure 2C**

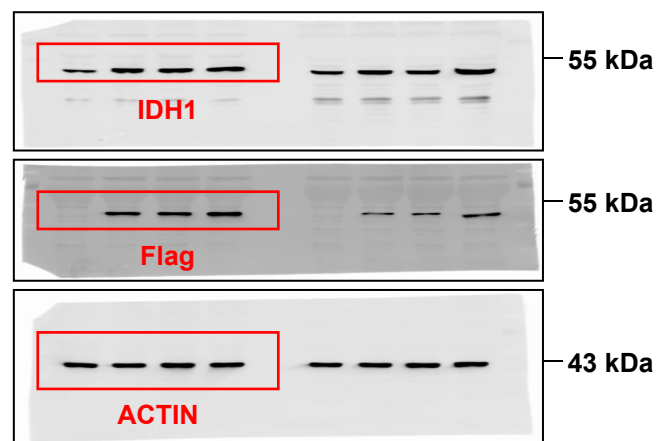

**A**

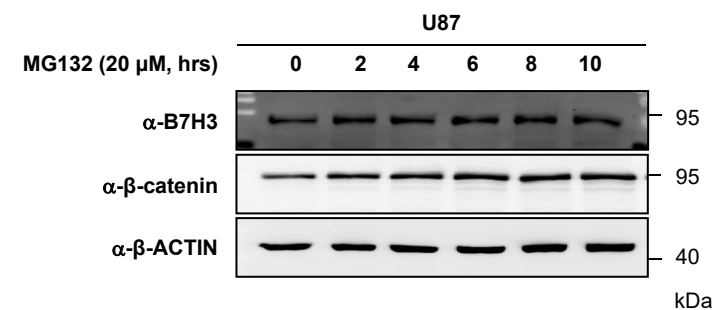

**Supplementary Figure 3A**

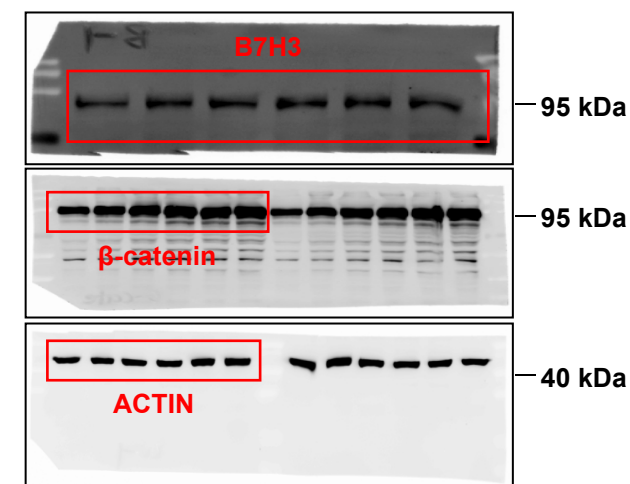

**B**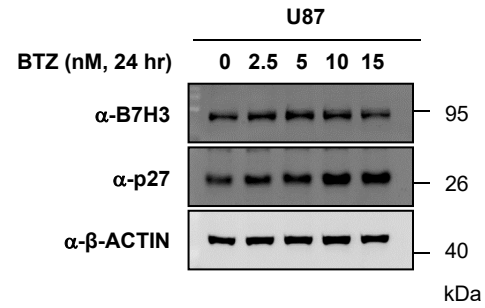**C**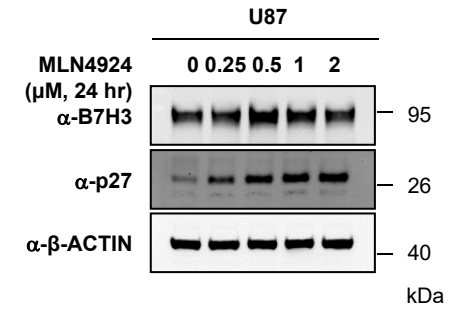**Supplementary Figure 3B**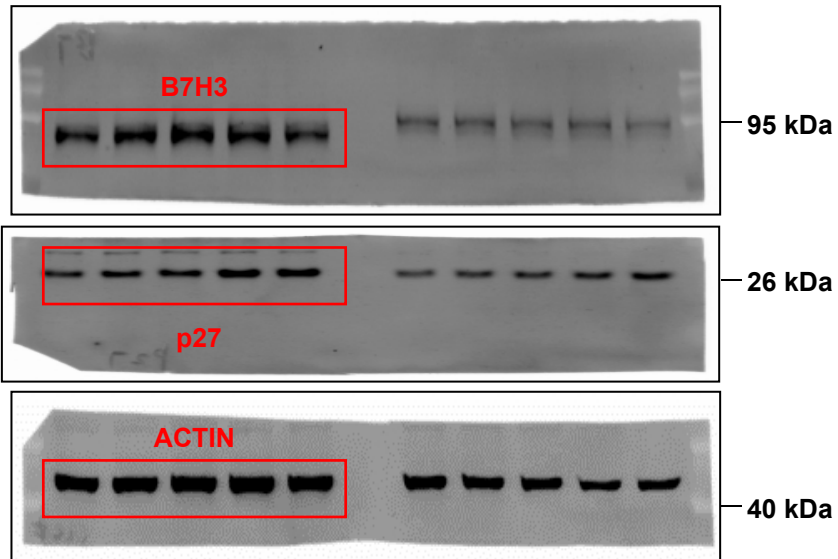**Supplementary Figure 3C**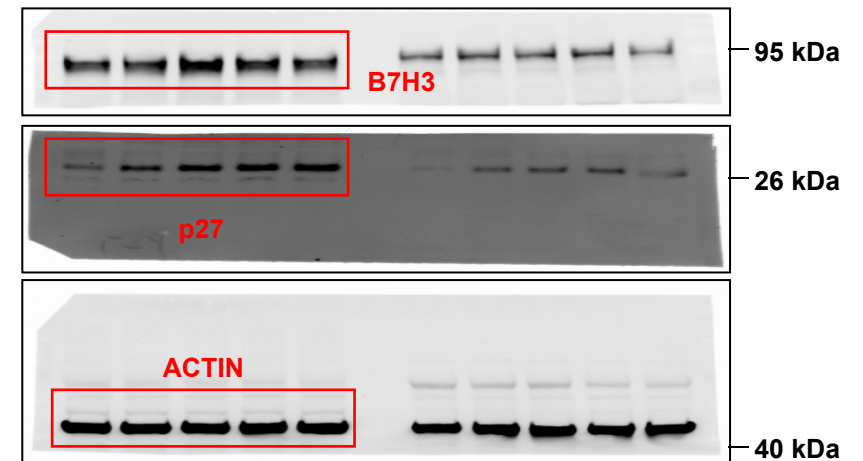

# Supplementary Figure 4A-D

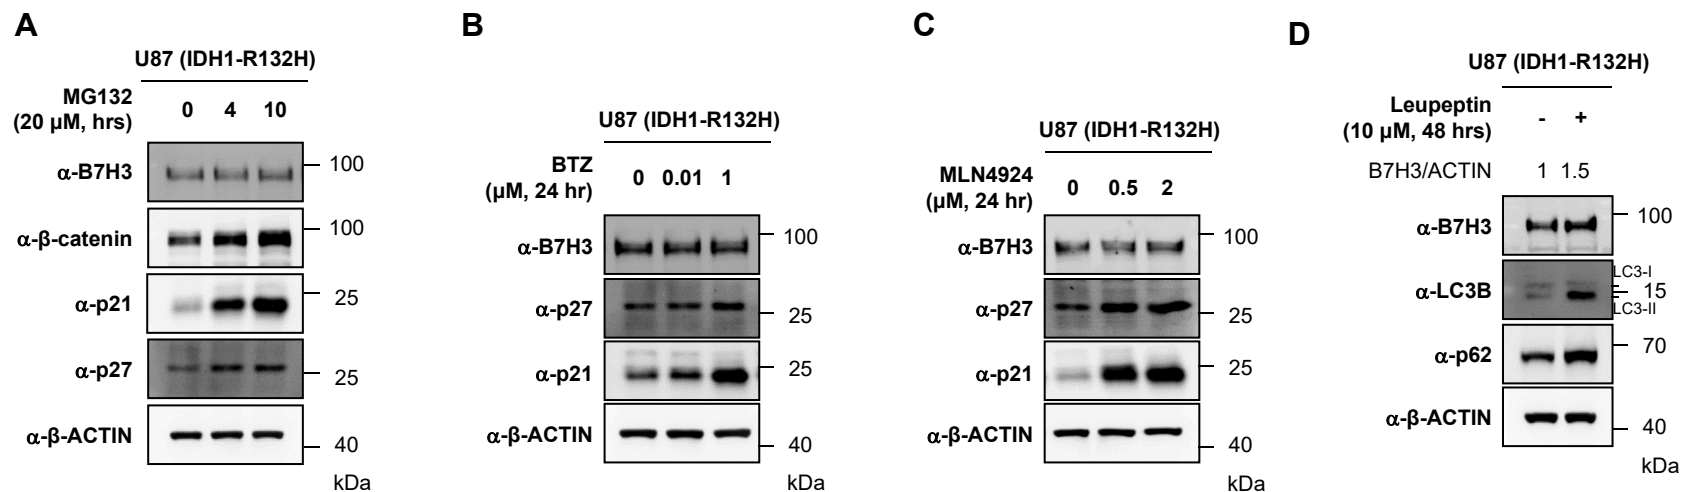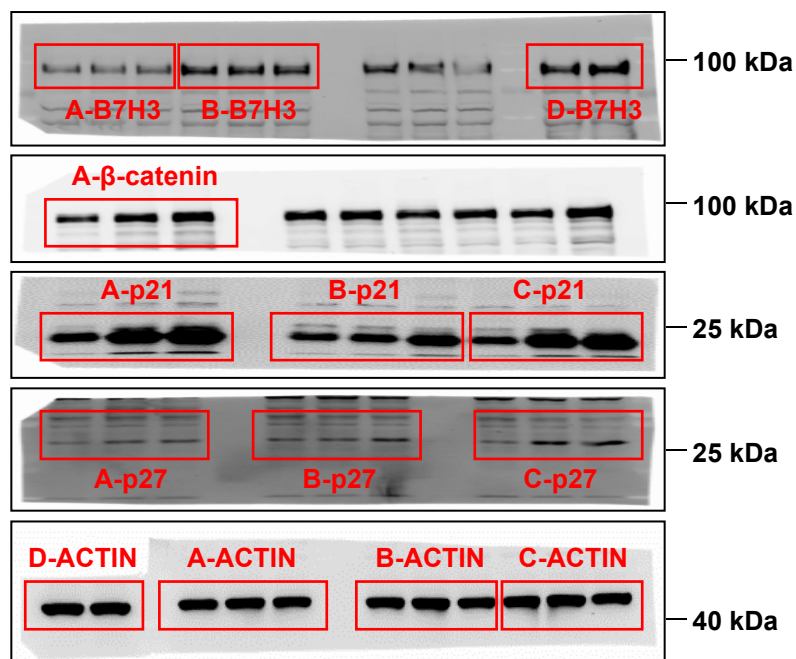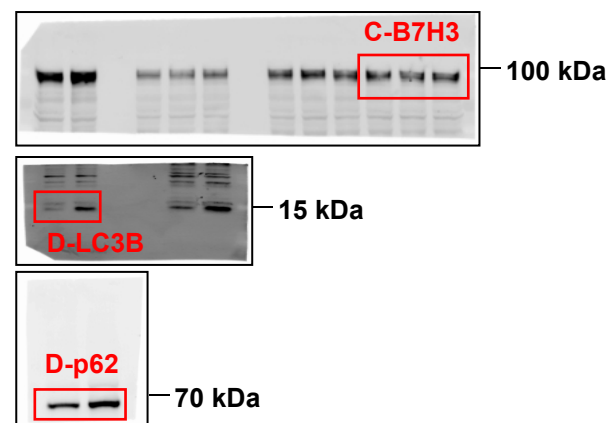

**A:** Supplementary Figure 4A

**B:** Supplementary Figure 4B

**C:** Supplementary Figure 4C

**D:** Supplementary Figure 4D

Supplementary Figure 4E

E

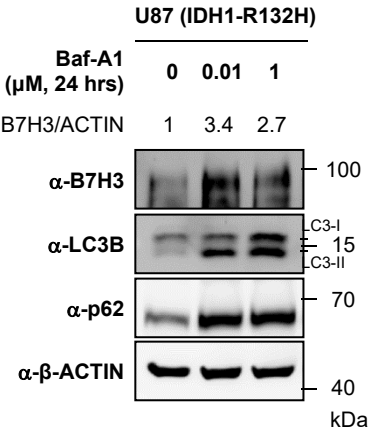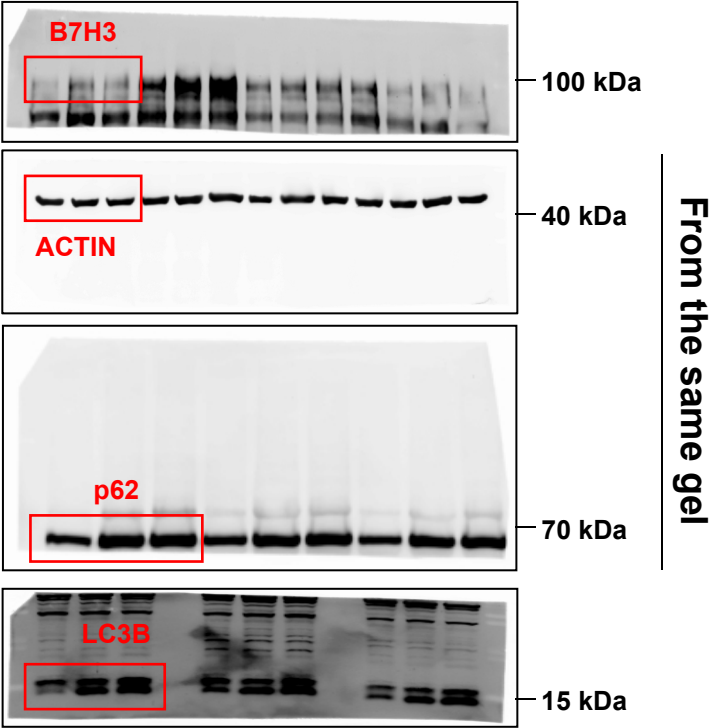

Supplement: Data_Sheet_3.zip [file Data_Sheet_3.zip]
