# Supplementary material for: The Inhibition of B7H3 by 2-HG Accumulation Is Associated With Downregulation of VEGFA in IDH Mutated Gliomas
Source: Frontiers journal article supplement (doi:10.3389/fcell.2021.670145), 2021-05-17
Supplement: Data_Sheet_3.zip [file Data_Sheet_3.zip]

T-TEST

|           |            |          |          |          |          |          |          |          |          |          |          |          |              |
|-----------|------------|----------|----------|----------|----------|----------|----------|----------|----------|----------|----------|----------|--------------|
| Figure 1B | IDH1-WT    | 6.713102 | 1        | 0.935045 | 6.810178 | 2.182495 | 2.792218 | 1.573214 | 1.181619 | 4.90036  | 2.563979 | 7.60244  |              |
|           | IDH1-R132H | 1.767073 | 1.680093 | 2.289038 | 0.416181 | 2.316632 | 1.17704  | 0.874846 | 0.398735 | 1.252627 | 0.971372 | 0.650674 | 0. 011250945 |

|           |        |         |            |                 |
|-----------|--------|---------|------------|-----------------|
| Figure 2E | Vector | IDH1-WT | IDH1-R132H | IDH1-R132H/T77A |
|           | 0      | 0       | 0.02441906 | 0               |
|           | 0      | 0       | 0.02524431 | 0               |
|           | 0      | 0       | 0.02555516 | 0               |

|           |        |         |            |                 |
|-----------|--------|---------|------------|-----------------|
| Figure 2F | Vector | IDH1-WT | IDH1-R132H | IDH1-R132H/T77A |
|           | 0      | 0       | 0.03040269 | 0               |
|           | 0      | 0       | 0.03120317 | 0               |
|           | 0      | 0       | 0.03002414 | 0               |

|           |            |      |              |
|-----------|------------|------|--------------|
| Figure 3A | Time (hrs) | DMSO | Octyl-D-2-HG |
|           | 0          | 1    | 1            |
|           | 2          | 1.32 | 0.96         |
|           | 4          | 1.22 | 0.90         |
|           | 6          | 1.01 | 0.84         |
|           | 8          | 0.96 | 0.84         |
|           | 10         | 0.92 | 0.88         |

|           |    |         |            |
|-----------|----|---------|------------|
| Figure 3B |    | IDH1-WT | IDH1-R132H |
|           | 0  | 1       | 1.00       |
|           | 2  | 0.78    | 1.08       |
|           | 4  | 0.88    | 0.83       |
|           | 6  | 0.72    | 0.89       |
|           | 8  | 1.19    | 0.93       |
|           | 10 | 1.02    | 1.03       |

|                            |                           |          |          |          |          |          |          |
|----------------------------|---------------------------|----------|----------|----------|----------|----------|----------|
| Supplementary<br>Figure 2A | pCDH-vector               | 71168.36 | 73184.85 | 73175.2  | 78797.34 | 72429.3  | 66992.8  |
|                            | pCDH-IDH1-WT-Flag         | 136527.3 | 140127.8 | 150313.6 | 153369.8 | 146897.8 | 143956.6 |
|                            | pCDH-IDH1-R132H-Flag      | 5651144  | 5593107  | 5320353  | 5438430  | 5341165  | 5093734  |
|                            | pCDH-IDH1-R132H/T77A-Flag | 73481.2  | 69661.24 | 81181.45 | 78447.94 | 72764.83 | 70108.58 |

|                            |                           |          |          |          |          |          |          |
|----------------------------|---------------------------|----------|----------|----------|----------|----------|----------|
| Supplementary<br>Figure 2B | pCDH-vector               | 5636.608 | 6038.706 | 5880.063 | 6794.702 | 8072.236 | 7590.518 |
|                            | pCDH-IDH1-WT-Flag         | 24773.46 | 24767.68 | 23392.56 | 23985.55 | 24007.15 | 23972.2  |
|                            | pCDH-IDH1-R132H-Flag      | 2987198  | 3122136  | 3021224  | 3088197  | 3042240  | 3013217  |
|                            | pCDH-IDH1-R132H/T77A-Flag | 6933.931 | 6329.045 | 6944.408 | 7128.895 | 6750.338 | 7046.955 |
